# Supplementary material for: Enhancing Inverse Modeling in Groundwater Systems through Machine Learning: A Comprehensive Comparative Study
Source: Copernicus journal article supplement (doi:10.5194/hess-2024-315), 2024-12-06
Supplement: Supplementary file 1 [file hess-2024-315-supplement.pdf]

## Supporting Information for

# Enhancing Inverse Modeling in Groundwater Systems through Machine Learning: A Comprehensive Comparative Study

Junjun Chen<sup>1,2</sup>, Zhenxue Dai<sup>2,3</sup>, Shangxian Yin<sup>4</sup>, Mingkun Zhang<sup>5</sup>, Mohamad Reza Soltanian<sup>6</sup>

<sup>1</sup> National and Local Joint Engineering Laboratory of Internet Application Technology on Mine, China University of Mining and Technology, Xuzhou, 221008, China

<sup>2</sup> College of Construction Engineering, Jilin University, Changchun, 130026, China

<sup>3</sup> School of Environmental and Municipal Engineering, Qingdao University of Technology, Qingdao, 273400, China

<sup>4</sup> College of Safety Engineering, North China Institute of Science and Technology, Langfang, 065201, China

<sup>5</sup> Shandong Rui Yi technology development Co., Ltd., Jinan, 250000, China

<sup>6</sup> Departments of Geosciences and Environmental Engineering, University of Cincinnati, OH, 45220, USA

Correspondence to: Zhenxue Dai ([dzx@jlu.edu.cn](mailto:dzx@jlu.edu.cn)), Shangxian Yin ([yinshx03@126.com](mailto:yinshx03@126.com))

## Contents of this file

Table S1 to Table S3

Figures S1 to S44

## Introduction

**Table S1** is the optimal hyperparameters for MSVR by four metaheuristic algorithms

**Table S2** and **S3** are  $RMSE_{(All)}$  and  $R^2_{All}$  values of FC-DNN with different number of hidden layers

**Table S4** is the RMSE values of estimated log-permeability fields for the four metaheuristic algorithms and the TNNA algorithm under Scenario 1-4.

**Fig.S1.** to **Fig.S2** are detail architectures of LeNet and ResNet.

**Fig.S3.** to **Fig.S6.** are pair-wise comparisons for four surrogate modeling methods.

**Fig.S7.** to **Fig.S10.** are spatial distributions of log-permeability field estimation results and absolute errors by four metaheuristic algorithms for Scenarios 1~4

**Fig.S11.** to **Fig.S14.** are spatial distributions of log-permeability field estimation results and absolute errors by the TNNA method for Scenarios 1~4

**Fig.S15.** to **Fig.S44.** are spatial distributions of calibrated numerical simulation results and absolute errors for solute concentrations using the TNNA algorithm and four metaheuristic algorithms (from day 2 to day 60 recorded every two days).



**Table S1 Optimal hyperparameters for MSVR by four metaheuristic algorithms**

| Training data number | Optimal algorithms | $C$           | $\varepsilon$     | $\sigma$     | MSE               |
|----------------------|--------------------|---------------|-------------------|--------------|-------------------|
| 200                  | GA                 | 18.640        | 6.0117E-03        | 0.398        | 6.2652E-02        |
|                      | <b>DE</b>          | <b>27.526</b> | <b>4.8503E-03</b> | <b>0.391</b> | <b>6.2498E-02</b> |
|                      | <b>PSO</b>         | <b>27.526</b> | <b>4.8503E-03</b> | <b>0.391</b> | <b>6.2498E-02</b> |
|                      | SA                 | 35.533        | 8.3451E-06        | 0.334        | 6.2499E-02        |
| 500                  | GA                 | 54.278        | 4.9071E-03        | 0.509        | 4.9246E-02        |
|                      | DE                 | 39.979        | 3.0950E-03        | 0.867        | 4.9729E-02        |
|                      | PSO                | 48.596        | 3.5939E-03        | 0.706        | 4.9215E-02        |
|                      | <b>SA</b>          | <b>32.241</b> | <b>5.5964E-03</b> | <b>0.615</b> | <b>4.8987E-02</b> |
| 1000                 | <b>GA</b>          | <b>23.296</b> | <b>4.2424E-03</b> | <b>0.724</b> | <b>4.3391E-02</b> |
|                      | DE                 | 40.680        | 3.9406E-03        | 0.585        | 4.3556E-02        |
|                      | PSO                | 25.317        | 6.1069E-03        | 0.820        | 4.3510E-02        |
|                      | SA                 | 71.104        | 4.0023E-05        | 0.561        | 4.3777E-02        |
| 2000                 | GA                 | 61.888        | 1.1828E-03        | 0.918        | 3.5188E-02        |
|                      | DE                 | 53.579        | 1.6516E-03        | 0.964        | 3.5137E-02        |
|                      | <b>PSO</b>         | <b>50.431</b> | <b>9.4148E-04</b> | <b>0.921</b> | <b>3.5120E-02</b> |
|                      | SA                 | 50.307        | 9.0781E-03        | 1.033        | 3.5265E-02        |

Note: The rows in bold represent the optimal hyperparameter configurations corresponding to the smallest MSE values.

**Table S2 RMSE<sub>(All)</sub> values of FC-DNN with different number of hidden layers**

| Training data number | Hidden layer number |                |                |                |         |         |         |
|----------------------|---------------------|----------------|----------------|----------------|---------|---------|---------|
|                      | 1                   | 2              | 3              | 4              | 5       | 6       | 7       |
| 200                  | 0.07588             | <b>0.05882</b> | 0.06870        | 0.17916        | 0.16125 | 0.13690 | 0.13340 |
| 500                  | 0.07050             | 0.04308        | 0.03788        | <b>0.03786</b> | 0.05824 | 0.09567 | 0.10229 |
| 1000                 | 0.05118             | 0.03571        | <b>0.02703</b> | 0.02732        | 0.02866 | 0.04213 | 0.07825 |
| 2000                 | 0.03936             | 0.02944        | <b>0.02090</b> | 0.02168        | 0.02580 | 0.03064 | 0.06887 |

Note: The bold values represent the smallest MSE values among the considered seven hidden layer numbers.

**Table S3  $R_{All}^2$  values of FC-DNN with different number of hidden layers**

| Training data number | Hidden layer number |                |                |                |         |         |         |
|----------------------|---------------------|----------------|----------------|----------------|---------|---------|---------|
|                      | 1                   | 2              | 3              | 4              | 5       | 6       | 7       |
| 200                  | 0.94140             | <b>0.96479</b> | 0.95197        | 0.67332        | 0.73539 | 0.80926 | 0.81890 |
| 500                  | 0.94942             | 0.98111        | 0.98540        | <b>0.98541</b> | 0.96548 | 0.90685 | 0.89351 |
| 1000                 | 0.97334             | 0.98703        | <b>0.99256</b> | 0.99240        | 0.99164 | 0.98194 | 0.93768 |
| 2000                 | 0.98424             | 0.99118        | <b>0.99555</b> | 0.99522        | 0.99323 | 0.99045 | 0.95173 |

Note: The bold values represent the largest  $R_{All}^2$  values among the considered seven hidden layer numbers.

**Table S4.** RMSE values of estimated log-permeability fields for the four metaheuristic algorithms and the TNNA algorithm under Scenario 1-4.

| Scenarios  | Metaheuristic algorithms |        |        |        | TNNA   |            |        |
|------------|--------------------------|--------|--------|--------|--------|------------|--------|
|            | GA                       | DE     | PSO    | SA     |        |            |        |
| Scenario 1 | $N_{PC}=100$             | 0.7844 | 0.5984 | 0.9423 | 0.7720 | epoch=200  | 0.4895 |
|            | $N_{PC}=500$             | 0.8246 | 0.7639 | 0.6379 | 0.8980 | epoch=1000 | 0.4748 |
|            | $N_{PC}=1000$            | 0.6659 | 0.6391 | 0.7127 | 0.8012 |            |        |
| Scenario 2 | $N_{PC}=100$             | 0.9554 | 0.5223 | 0.8785 | 0.6987 | epoch=200  | 0.4317 |
|            | $N_{PC}=500$             | 0.6164 | 0.4925 | 1.0293 | 1.1549 | epoch=1000 | 0.4271 |
|            | $N_{PC}=1000$            | 0.5389 | 0.5322 | 0.9686 | 0.6288 |            |        |
| Scenario 3 | $N_{PC}=100$             | 0.5386 | 0.3892 | 0.5486 | 0.5647 | epoch=200  | 0.3161 |
|            | $N_{PC}=500$             | 0.4339 | 0.4271 | 0.5762 | 0.5714 | epoch=1000 | 0.2970 |
|            | $N_{PC}=1000$            | 0.4060 | 0.5042 | 0.6295 | 0.5558 |            |        |
| Scenario 4 | $N_{PC}=100$             | 0.4436 | 0.3841 | 0.5723 | 0.6459 | epoch=200  | 0.2749 |
|            | $N_{PC}=500$             | 0.4265 | 0.3971 | 0.3770 | 0.5654 | epoch=1000 | 0.2328 |
|            | $N_{PC}=1000$            | 0.3653 | 0.3459 | 0.5367 | 0.5033 |            |        |

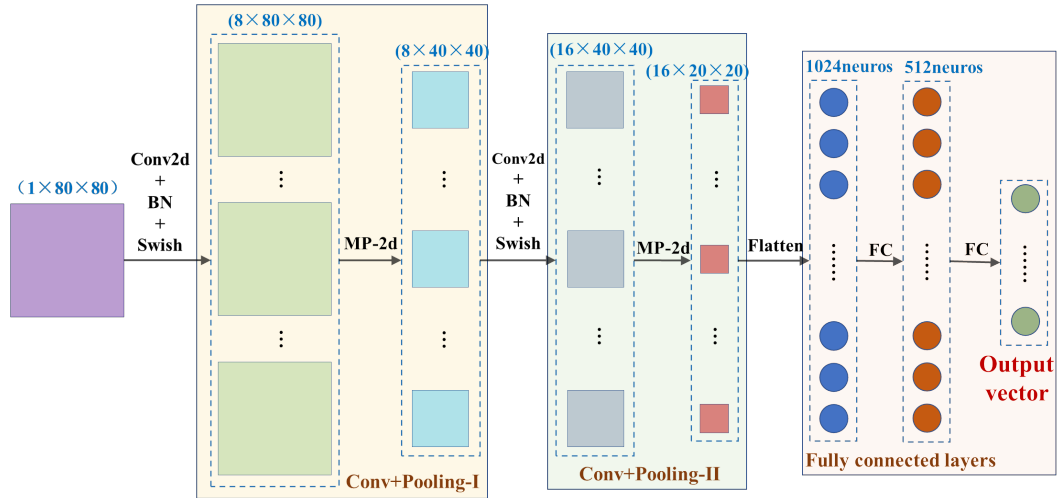

**Fig.S1.** Detailed architecture of a LeNet based CNN. The input matrix data are obtained according to Figure 2(c) and subjected to feature extraction through a sequence of two convolutional and pooling layers, subsequently connected to the output layer using a flatten layer and two fully connected layers.

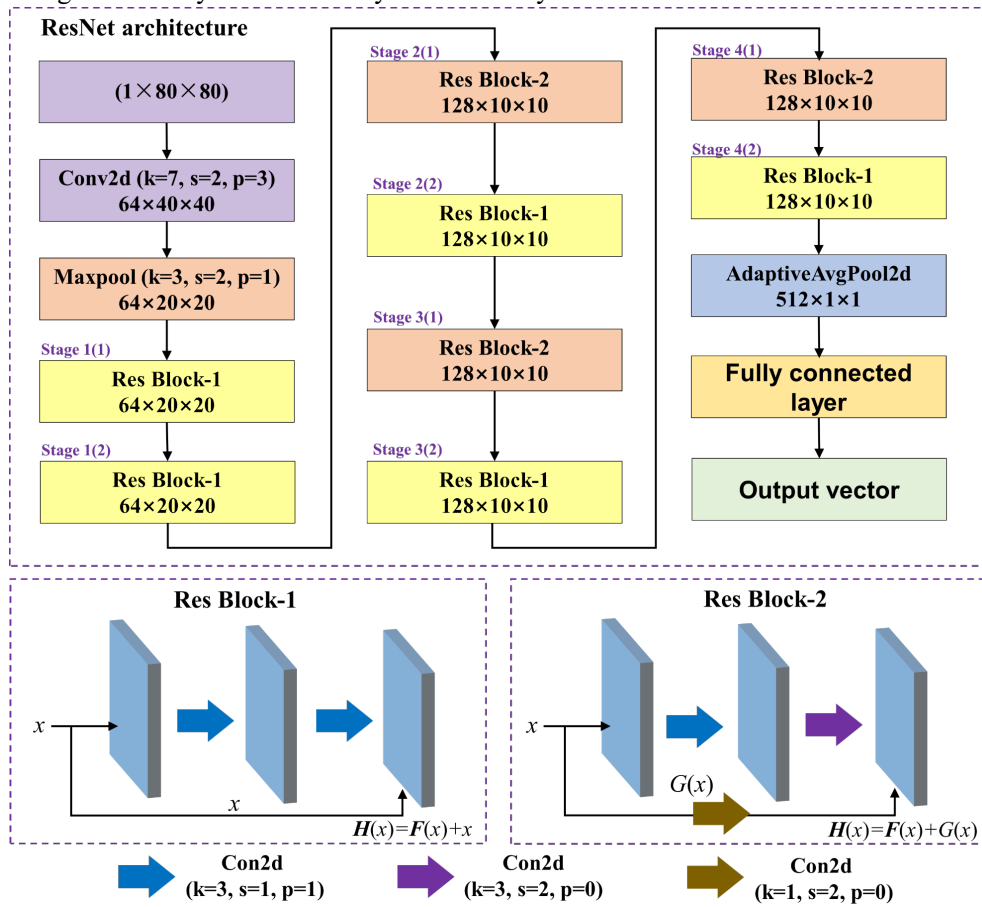

**Fig.S2.** Detailed architecture of a ResNet based CNN. The input matrix data are obtained according to Figure 2(c). “Res Block-1” and “Res Block-2” are two different types of residual blocks used in this ResNet. Eight residual blocks in four stages are designed in this ResNet. “Stage  $i$  ( $j$ )” represents the  $j$ th residual block used in stage  $i$ .

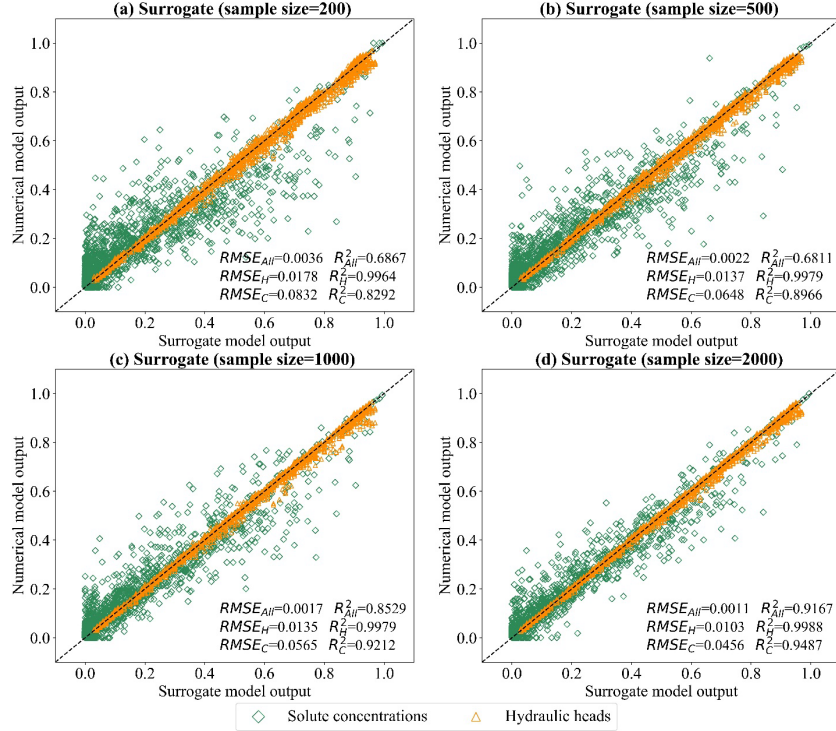

**Fig.S3.** Performance of MSVR based surrogate models for the solute concentration and hydraulic head prediction. (a~d) are pair-wise comparisons based on surrogate models trained by 200, 500, 1000, and 2000 training samples, respectively.

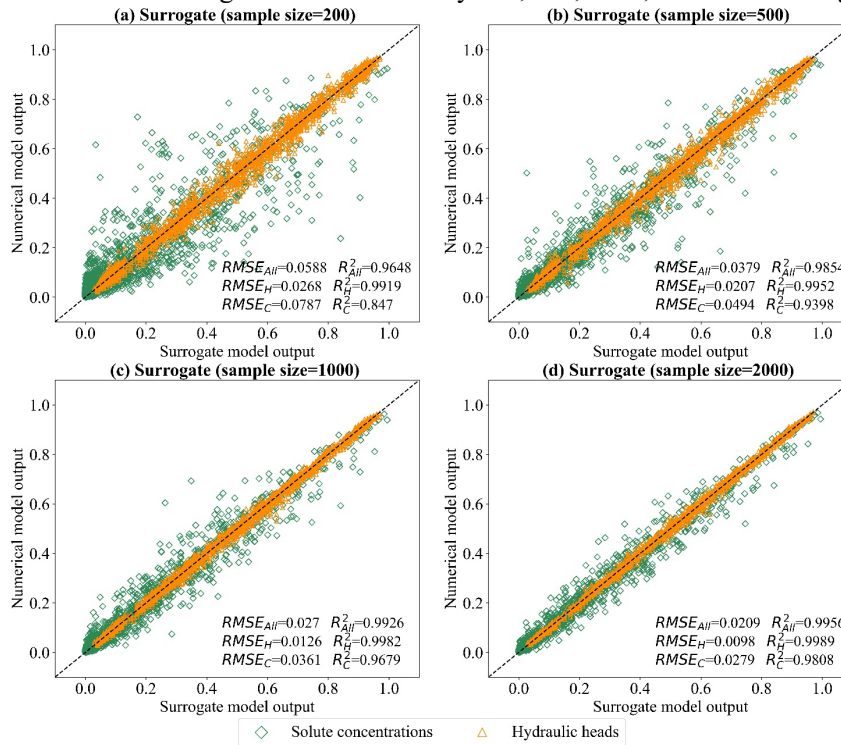

**Fig.S4.** Performance of FC-DNN based surrogate models for the solute concentration and hydraulic head prediction. (a~d) are pair-wise comparisons based on surrogate models trained by 200, 500, 1000, and 2000 training samples, respectively.

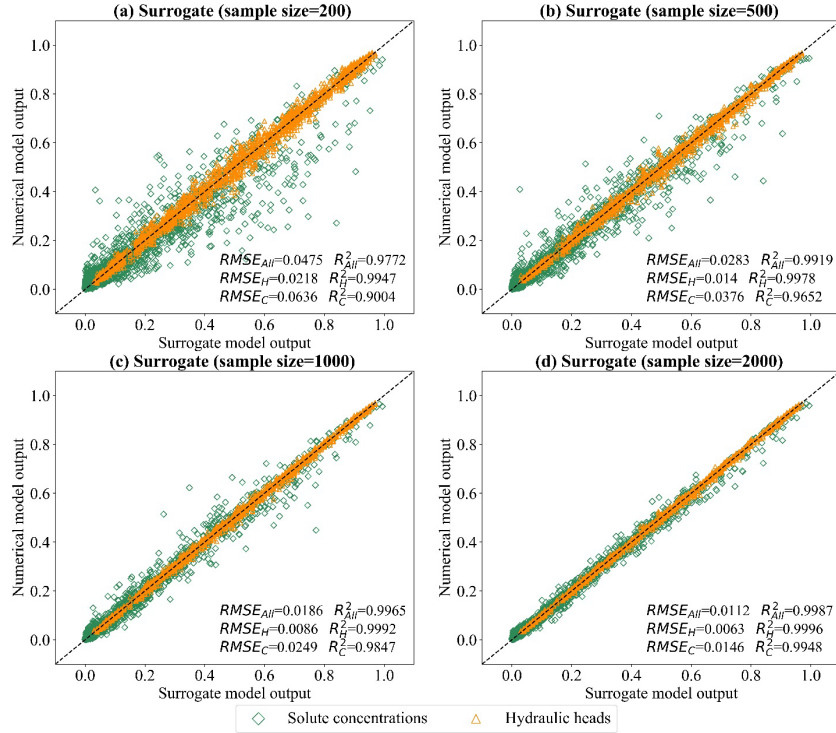

**Fig.S5.** Performance of LeNet CNN based surrogate models for the solute concentration and hydraulic head prediction. (a~d) are pair-wise comparisons based on surrogate models trained by 200, 500, 1000, and 2000 training samples, respectively.

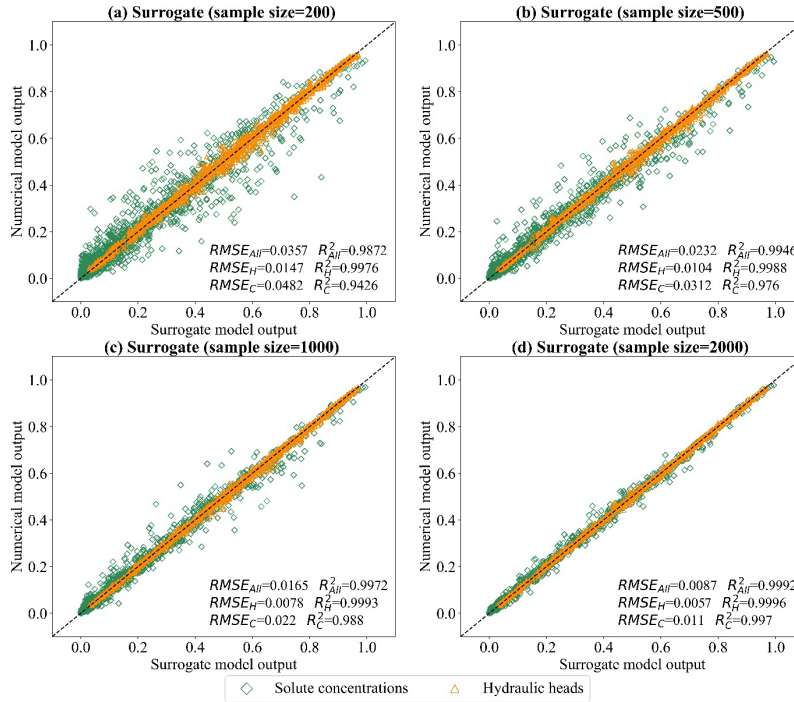

**Fig.S6.** Performance of ResNet CNN based surrogate models for the solute concentration and hydraulic head prediction. (a~d) are pair-wise comparisons based on surrogate models trained by 200, 500, 1000, and 2000 training samples, respectively.



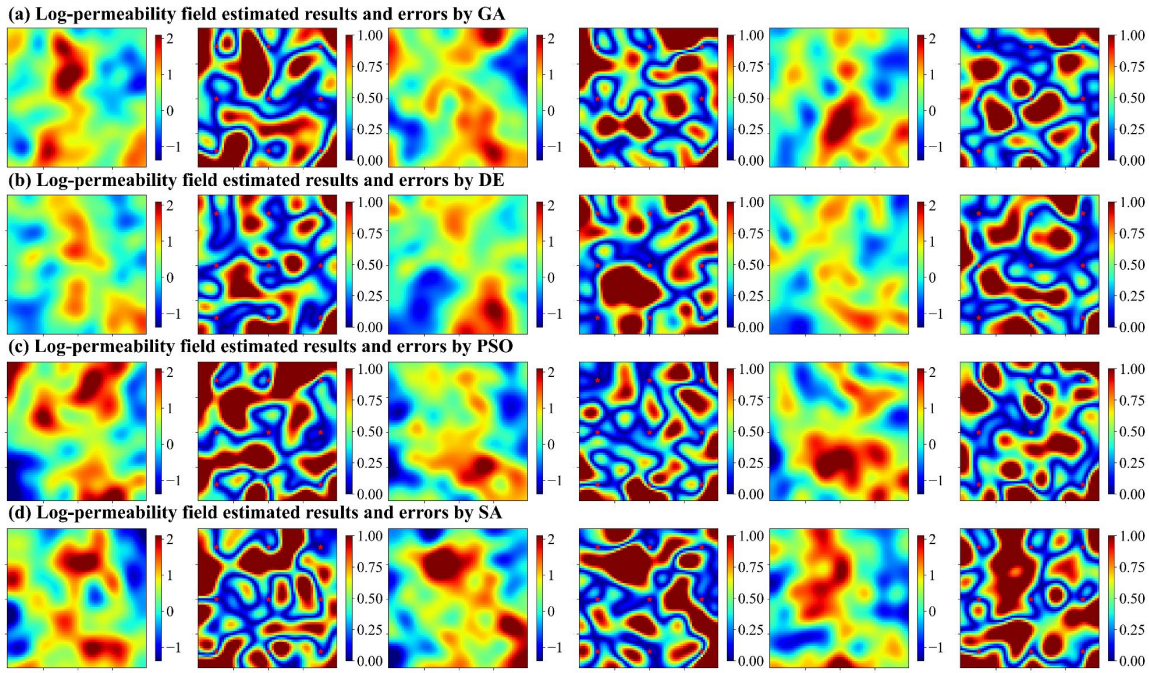

**Fig.S7** Spatial distributions of log-permeability field estimation results (row 1, 3, and 5 for  $N_{PC}=100, 500,$  and  $1000,$  respectively) and absolute errors (row 2, 4, and 6 for  $N_{PC}=100, 500,$  and  $1000,$  respectively) for Scenario 1, achieved by four metaheuristic algorithms.

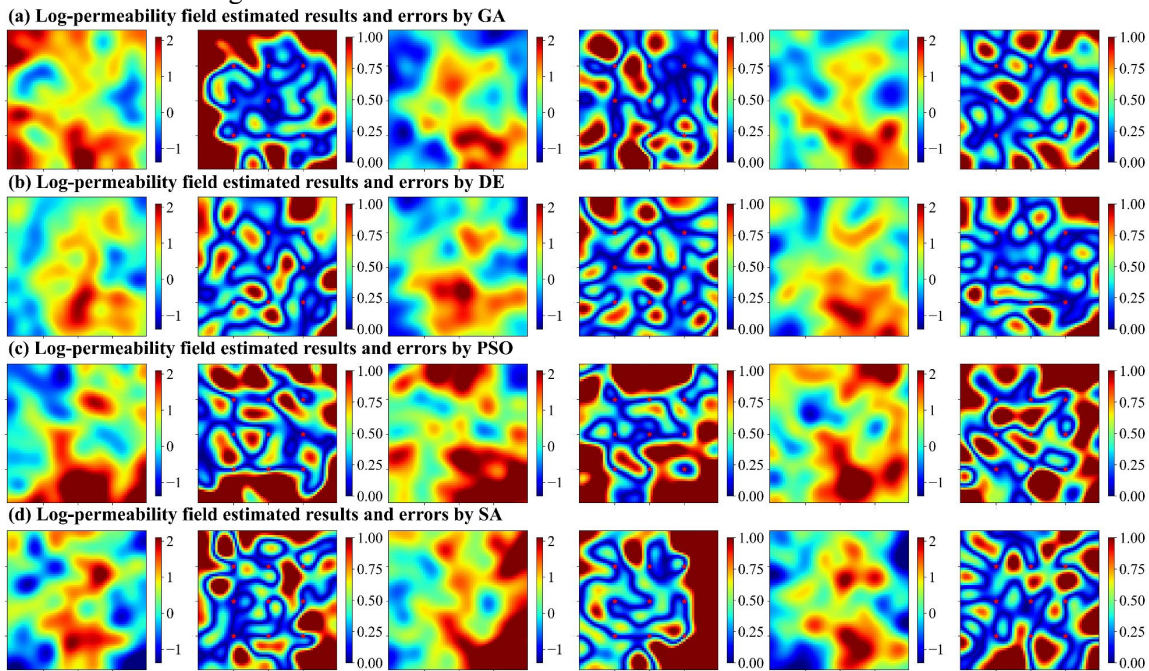

**Fig.S8** Spatial distributions of log-permeability field estimation results (row 1, 3, and 5 for  $N_{PC}=100, 500,$  and  $1000,$  respectively) and absolute errors (row 2, 4, and 6 for  $N_{PC}=100, 500,$  and  $1000,$  respectively) for Scenario 2, achieved by four metaheuristic algorithms.



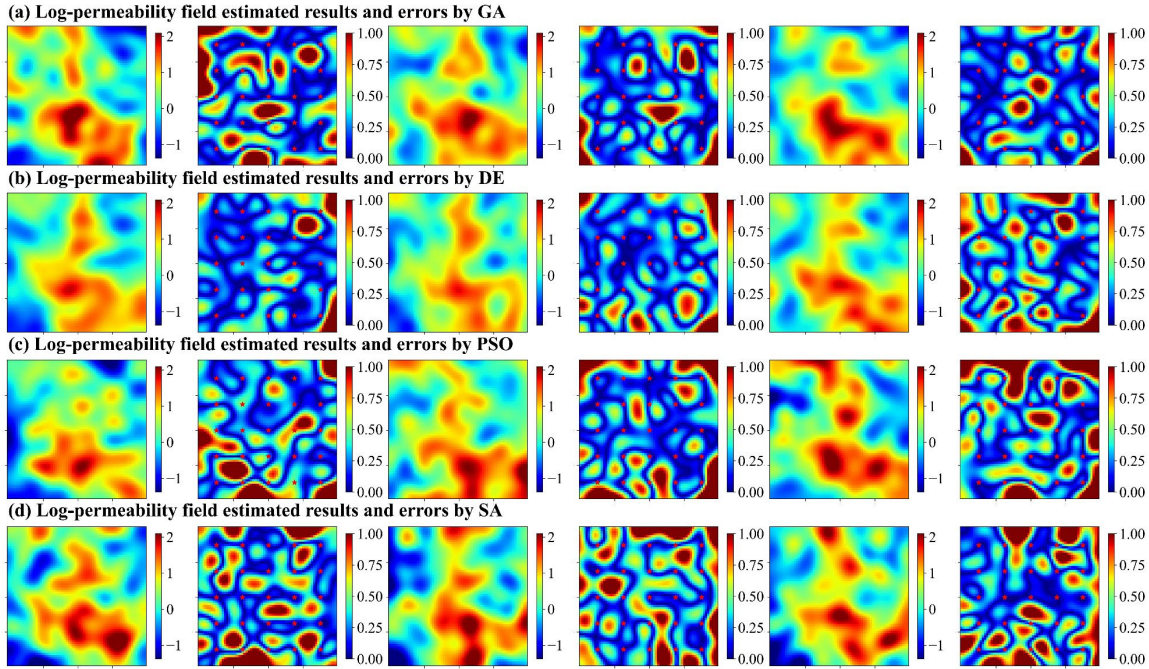

**Fig.S9** Spatial distributions of log-permeability field estimation results (row 1, 3, and 5 for  $N_{PC}=100, 500,$  and  $1000,$  respectively) and absolute errors (row 2, 4, and 6 for  $N_{PC}=100, 500,$  and  $1000,$  respectively) for Scenario 3, achieved by four metaheuristic algorithms.

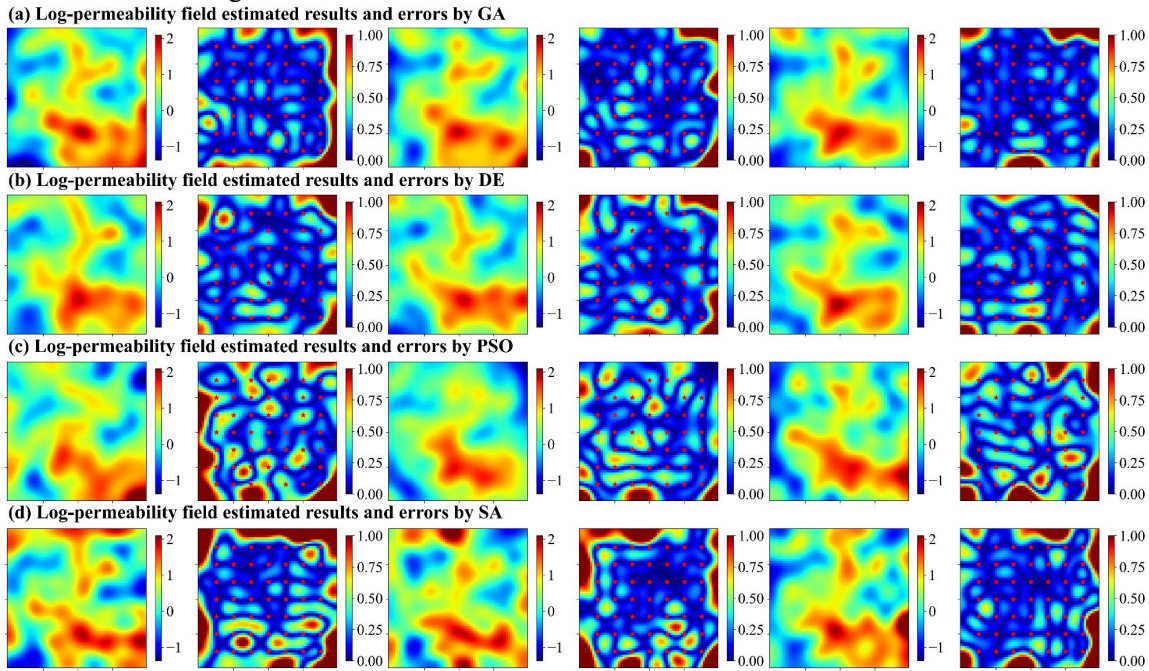

**Fig.S10** Spatial distributions of log-permeability field estimation results (row 1, 3, and 5 for  $N_{PC}=100, 500,$  and  $1000,$  respectively) and absolute errors (row 2, 4, and 6 for  $N_{PC}=100, 500,$  and  $1000,$  respectively) for Scenario 4, achieved by four metaheuristic algorithms.

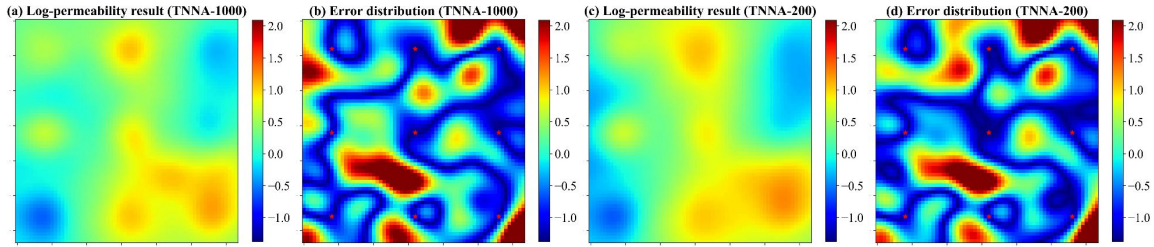

**Fig.S11.** Spatial distributions log-permeability field estimation results and absolute errors for Scenario 1, achieved by the TNNA inversion algorithm.

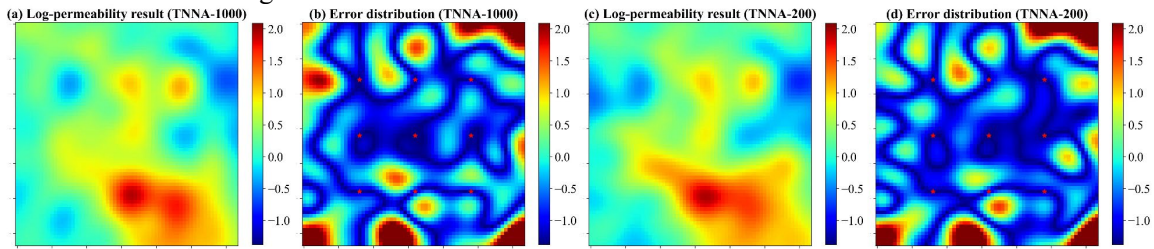

**Fig.S12.** Spatial distributions log-permeability field estimation results and absolute errors for Scenario 2, achieved by the TNNA inversion algorithm.

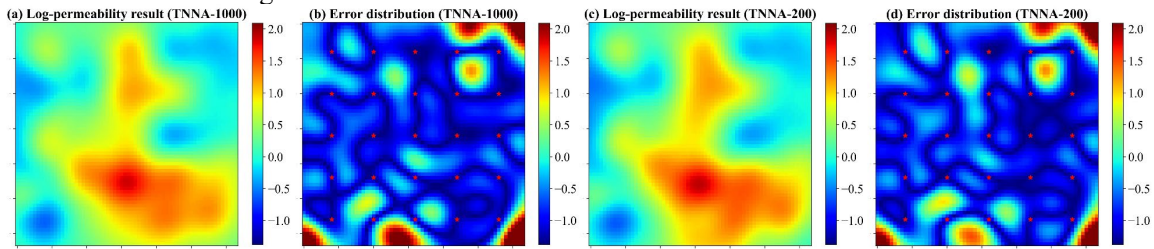

**Fig.S13.** Spatial distributions log-permeability field estimation results and absolute errors for Scenario 3, achieved by the TNNA inversion algorithm.

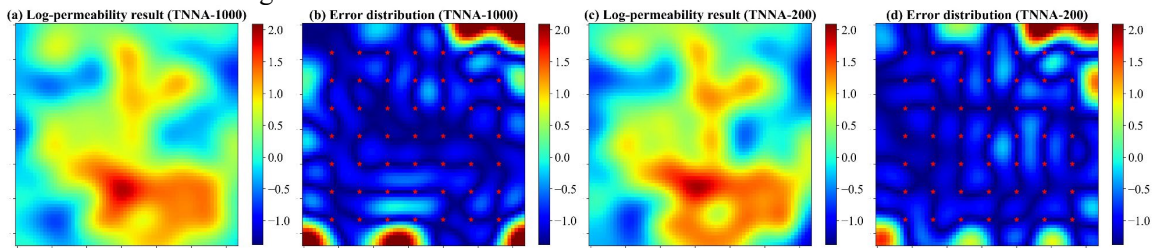

**Fig.S14.** Spatial distributions log-permeability field estimation results and absolute errors for Scenario 4, achieved by the TNNA inversion algorithm.



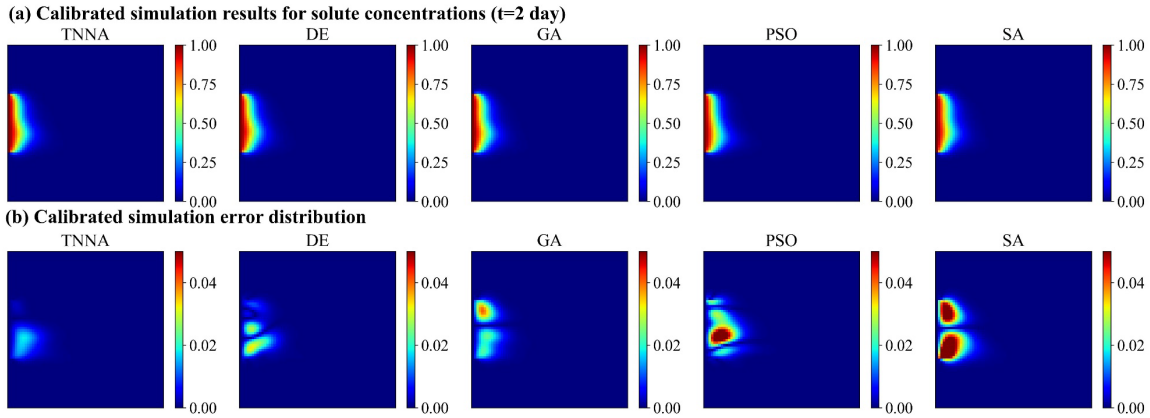

**Fig.S15.** Spatial distributions of calibrated numerical simulation results and absolute errors for solute concentrations ( $t=2$  day) using the TNNA algorithm and four metaheuristic algorithms.

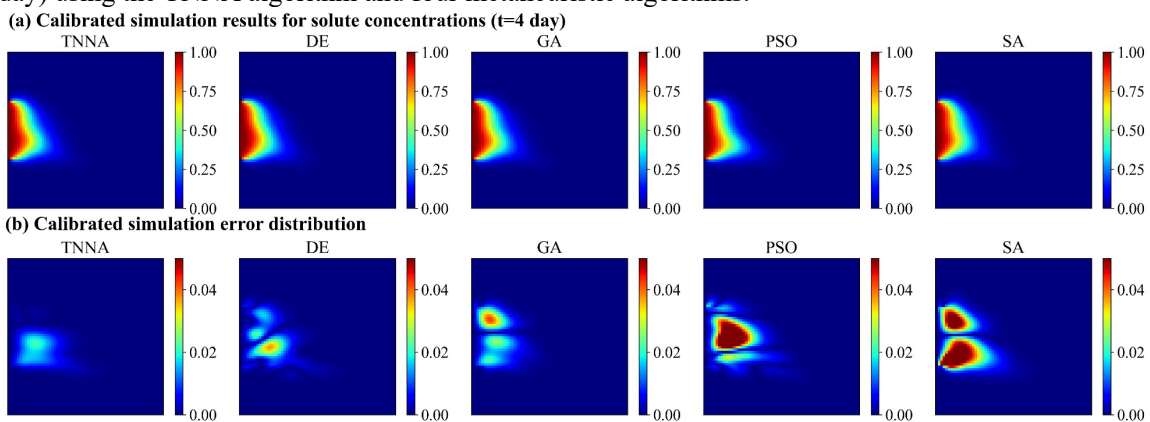

**Fig.S16.** Spatial distributions of calibrated numerical simulation results and absolute errors for solute concentrations ( $t=4$  day) using the TNNA algorithm and four metaheuristic algorithms.

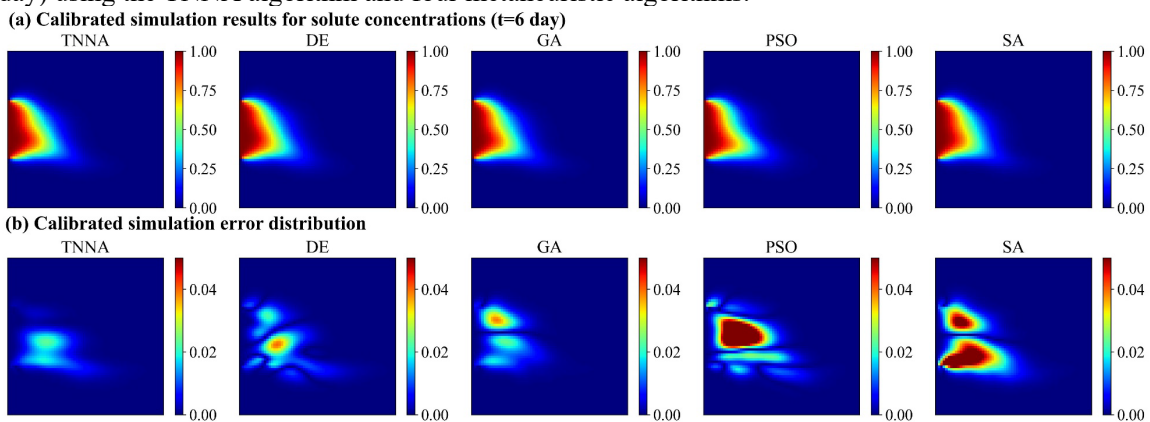

**Fig.S17.** Spatial distributions of calibrated numerical simulation results and absolute errors for solute concentrations ( $t=6$  day) using the TNNA algorithm and four metaheuristic algorithms.

(a) Calibrated simulation results for solute concentrations ( $t=8$  day)

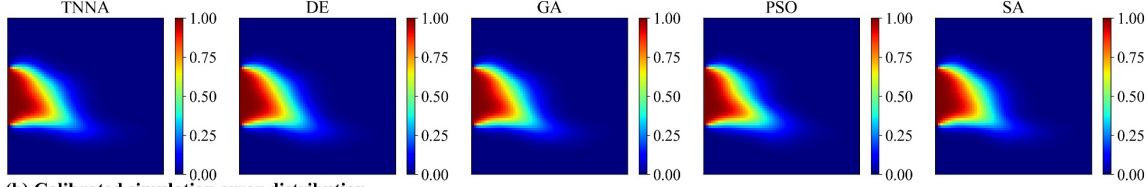

(b) Calibrated simulation error distribution

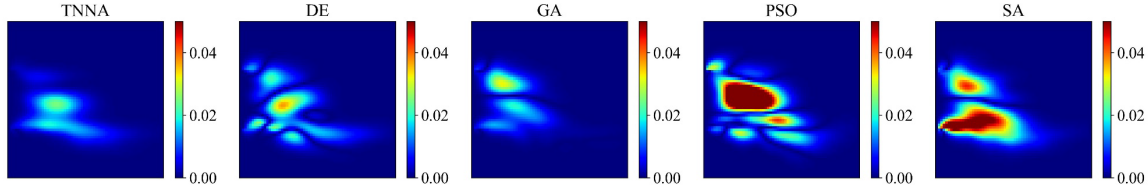

**Fig.S18.** Spatial distributions of calibrated numerical simulation results and absolute errors for solute concentrations ( $t=8$  day) using the TNNA algorithm and four metaheuristic algorithms.

(a) Calibrated simulation results for solute concentrations ( $t=10$  day)

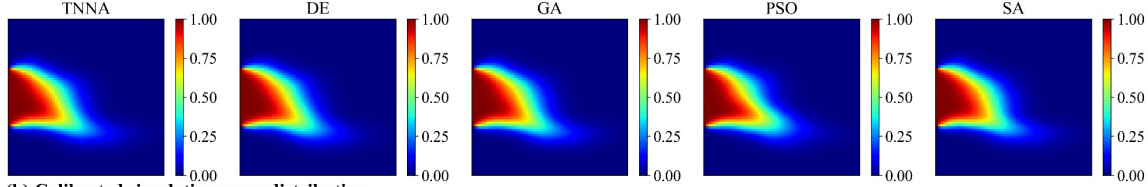

(b) Calibrated simulation error distribution

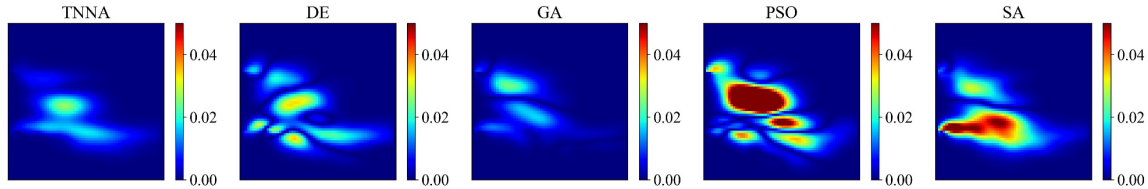

**Fig.S19.** Spatial distributions of calibrated numerical simulation results and absolute errors for solute concentrations ( $t=10$  day) using the TNNA algorithm and four metaheuristic algorithms.

(a) Calibrated simulation results for solute concentrations ( $t=12$  day)

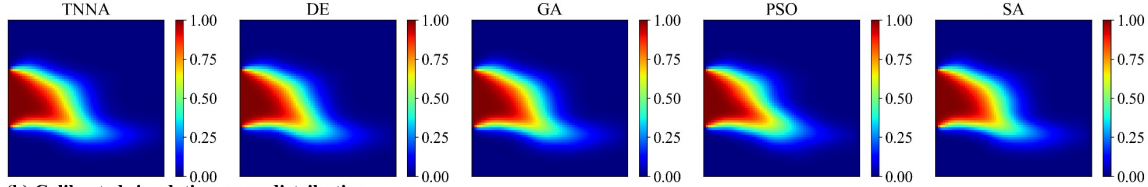

(b) Calibrated simulation error distribution

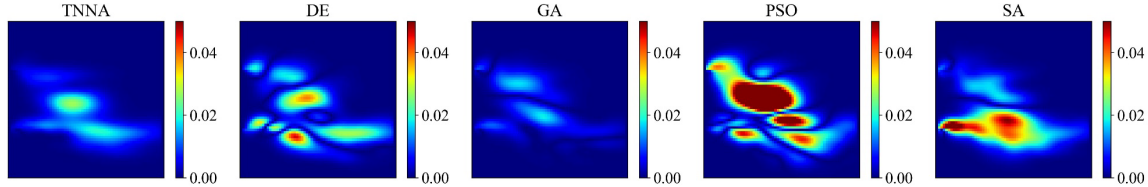

**Fig.S20.** Spatial distributions of calibrated numerical simulation results and absolute errors for solute concentrations ( $t=12$  day) using the TNNA algorithm and four metaheuristic algorithms.

(a) Calibrated simulation results for solute concentrations ( $t=14$  day)

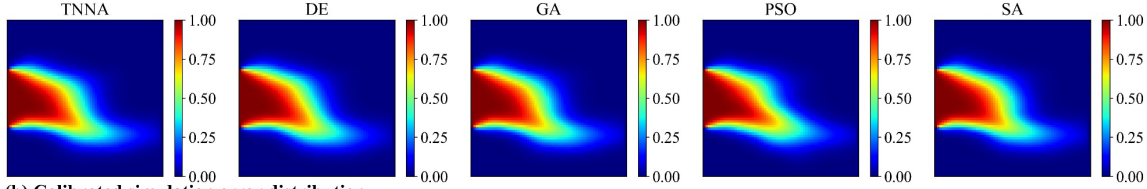

(b) Calibrated simulation error distribution

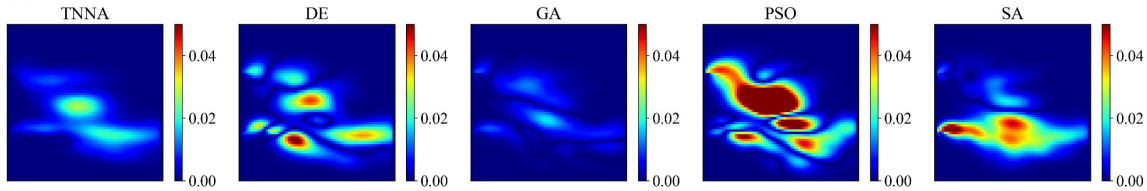

**Fig.S21.** Spatial distributions of calibrated numerical simulation results and absolute errors for solute concentrations ( $t=14$  day) using the TNNA algorithm and four metaheuristic algorithms.

(a) Calibrated simulation results for solute concentrations ( $t=16$  day)

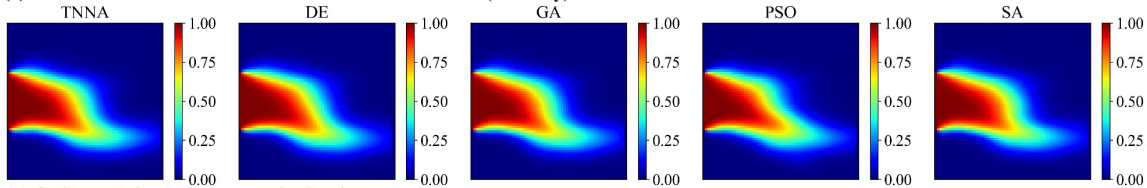

(b) Calibrated simulation error distribution

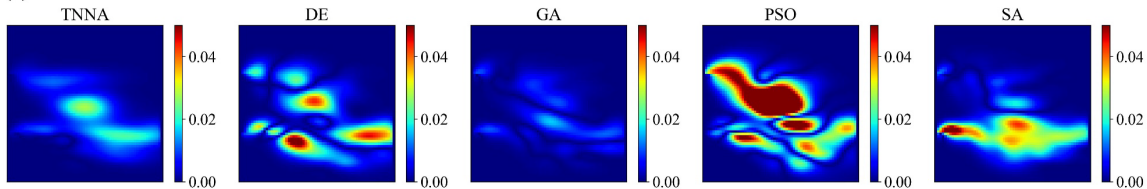

**Fig.S22** Spatial distributions of calibrated numerical simulation results and absolute errors for solute concentrations ( $t=16$  day) using the TNNA algorithm and four metaheuristic algorithms.

(a) Calibrated simulation results for solute concentrations ( $t=18$  day)

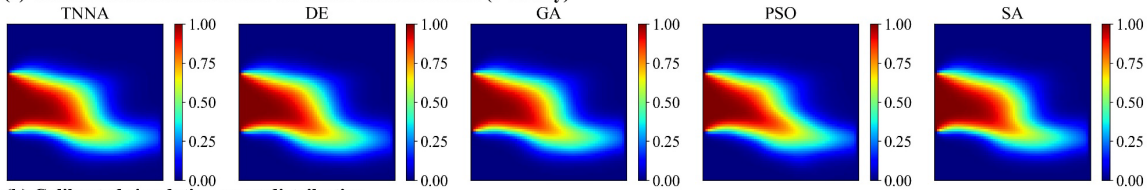

(b) Calibrated simulation error distribution

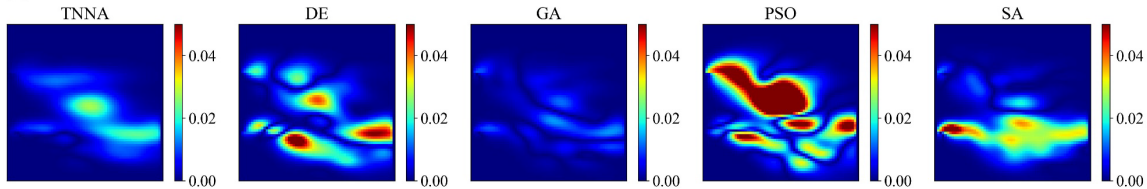

**Fig.S23** Spatial distributions of calibrated numerical simulation results and absolute errors for solute concentrations ( $t=18$  day) using the TNNA algorithm and four metaheuristic algorithms.

**(a) Calibrated simulation results for solute concentrations ( $t=20$  day)**

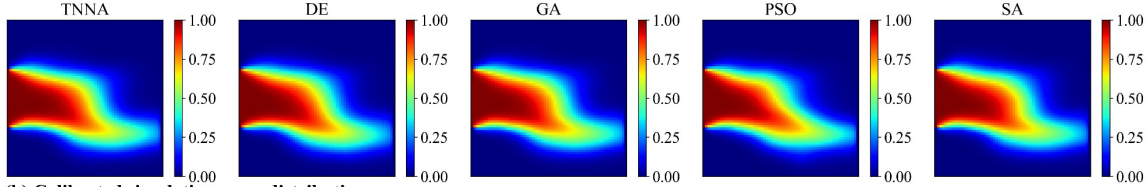

**(b) Calibrated simulation error distribution**

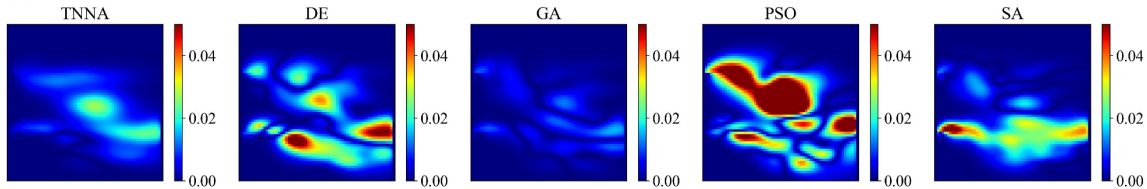

**Fig.S24** Spatial distributions of calibrated numerical simulation results and absolute errors for solute concentrations ( $t=20$  day) using the TNNA algorithm and four metaheuristic algorithms.

**(a) Calibrated simulation results for solute concentrations ( $t=22$  day)**

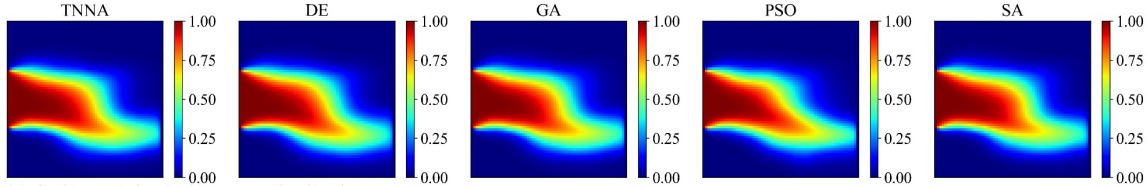

**(b) Calibrated simulation error distribution**

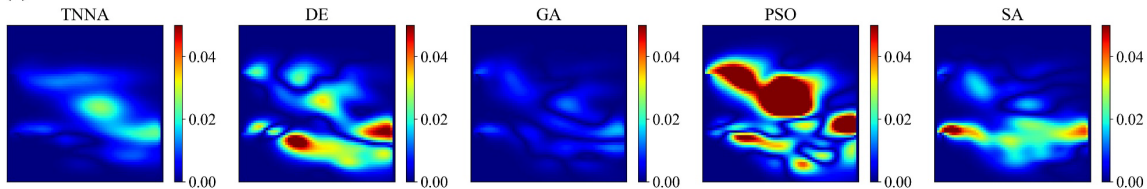

**Fig.S25.** Spatial distributions of calibrated numerical simulation results and absolute errors for solute concentrations ( $t=22$  day) using the TNNA algorithm and four metaheuristic algorithms.

**(a) Calibrated simulation results for solute concentrations ( $t=24$  day)**

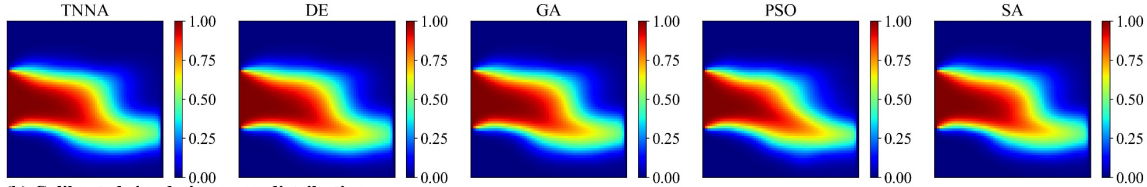

**(b) Calibrated simulation error distribution**

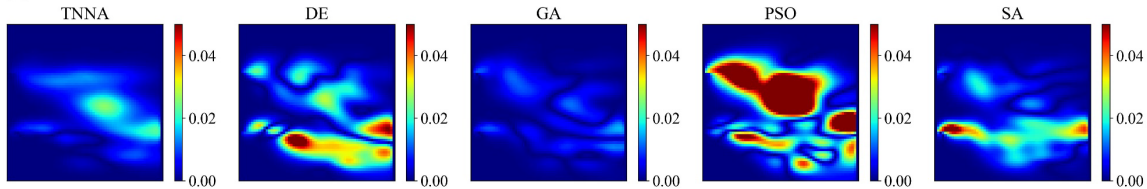

**Fig.S26.** Spatial distributions of calibrated numerical simulation results and absolute errors for solute concentrations ( $t=24$  day) using the TNNA algorithm and four metaheuristic algorithms.



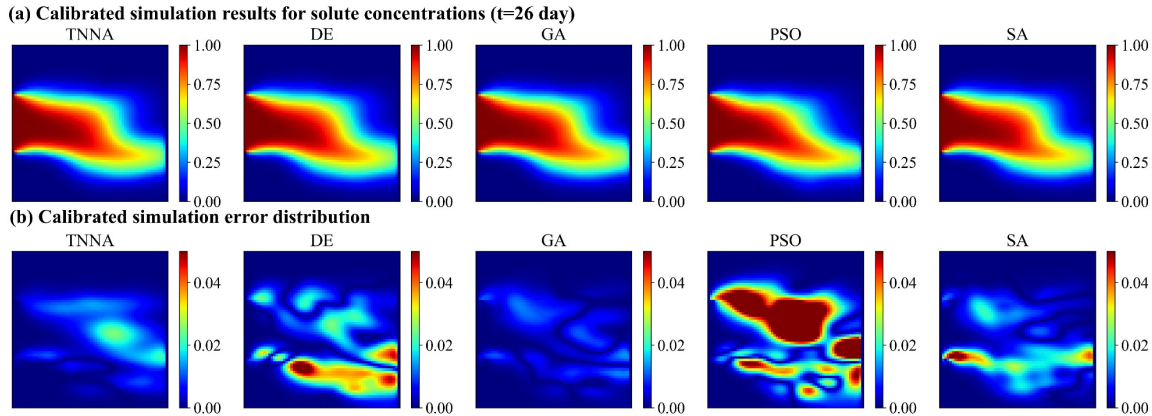

**Fig.S27.** Spatial distributions of calibrated numerical simulation results and absolute errors for solute concentrations ( $t=26$  day) using the TNNA algorithm and four metaheuristic algorithms.

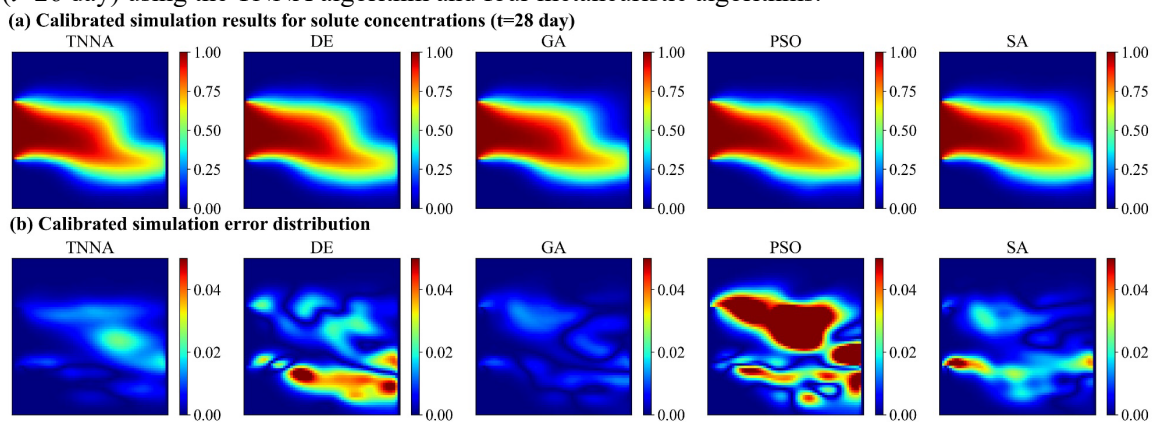

**Fig.S28.** Spatial distributions of calibrated numerical simulation results and absolute errors for solute concentrations ( $t=28$  day) using the TNNA algorithm and four metaheuristic algorithms.

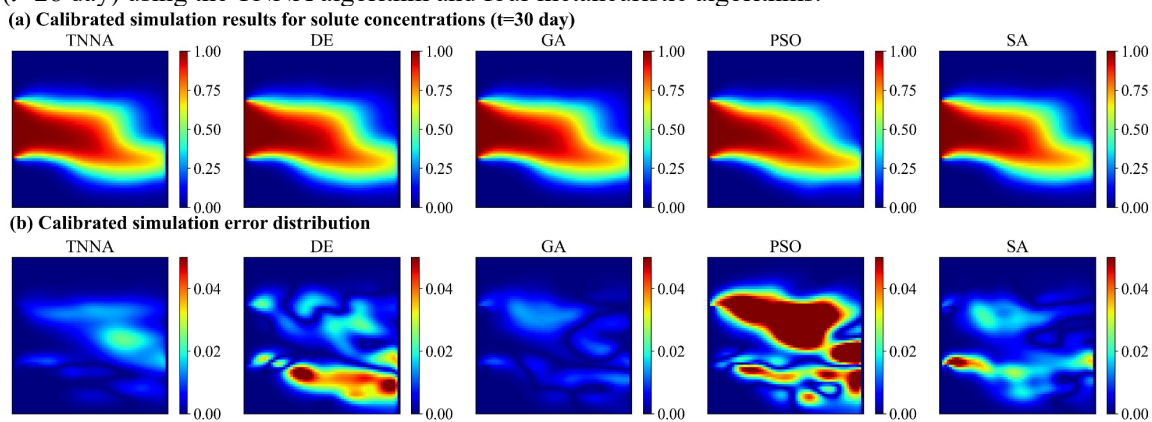

**Fig.S29.** Spatial distributions of calibrated numerical simulation results and absolute errors for solute concentrations ( $t=30$  day) using the TNNA algorithm and four metaheuristic algorithms.

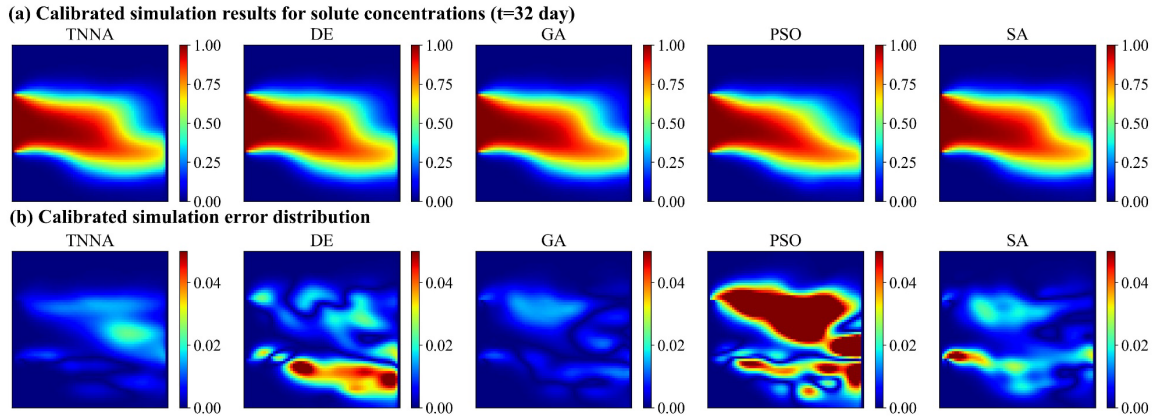

**Fig.S30.** Spatial distributions of calibrated numerical simulation results and absolute errors for solute concentrations ( $t=32$  day) using the TNNA algorithm and four metaheuristic algorithms.

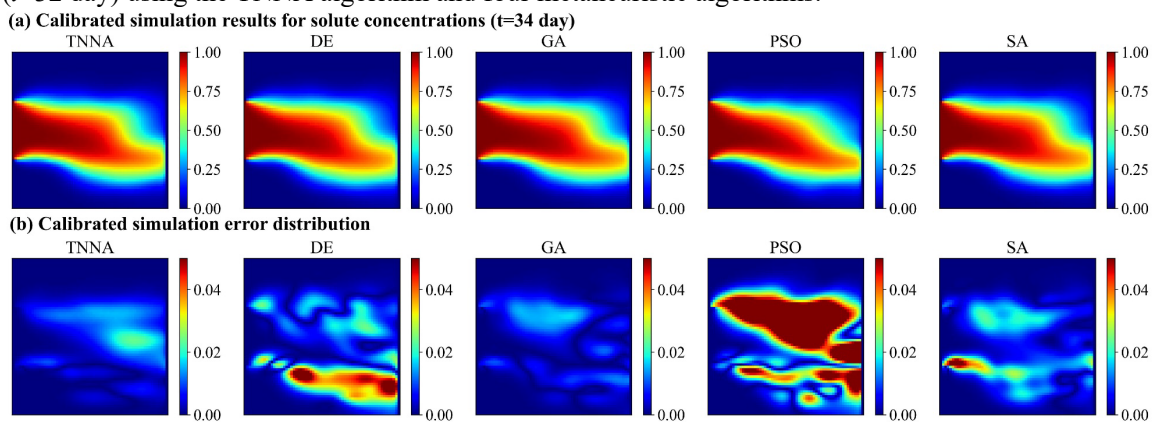

**Fig.S31.** Spatial distributions of calibrated numerical simulation results and absolute errors for solute concentrations ( $t=34$  day) using the TNNA algorithm and four metaheuristic algorithms.

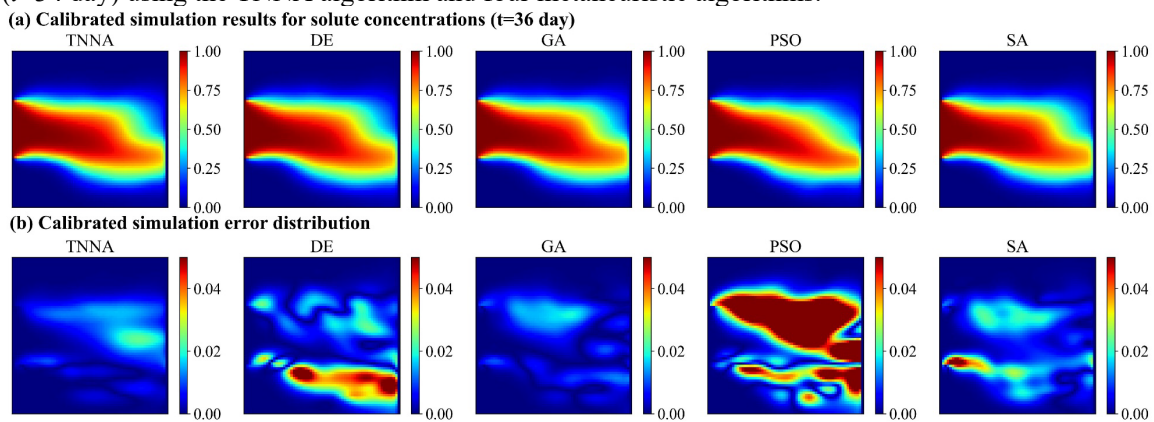

**Fig.S32.** Spatial distributions of calibrated numerical simulation results and absolute errors for solute concentrations ( $t=36$  day) using the TNNA algorithm and four metaheuristic algorithms.

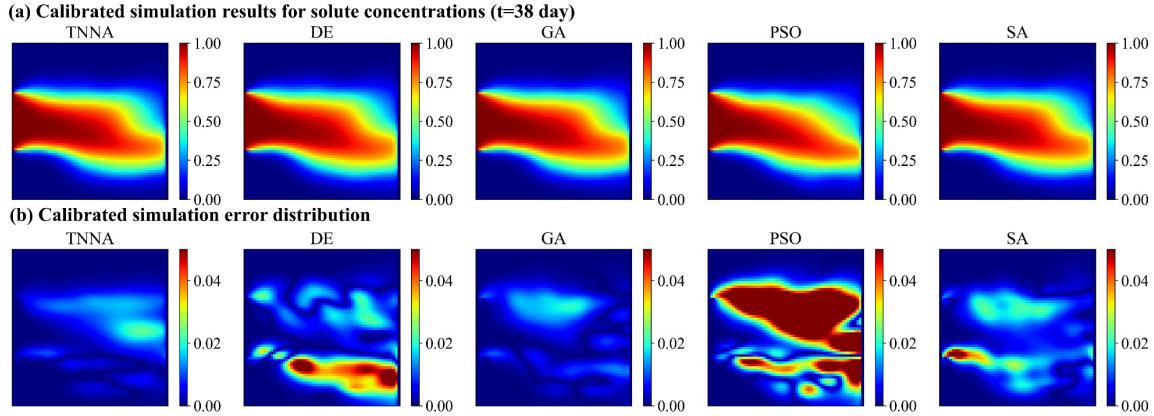

**Fig.S33.** Spatial distributions of calibrated numerical simulation results and absolute errors for solute concentrations ( $t=38$  day) using the TNNA algorithm and four metaheuristic algorithms.

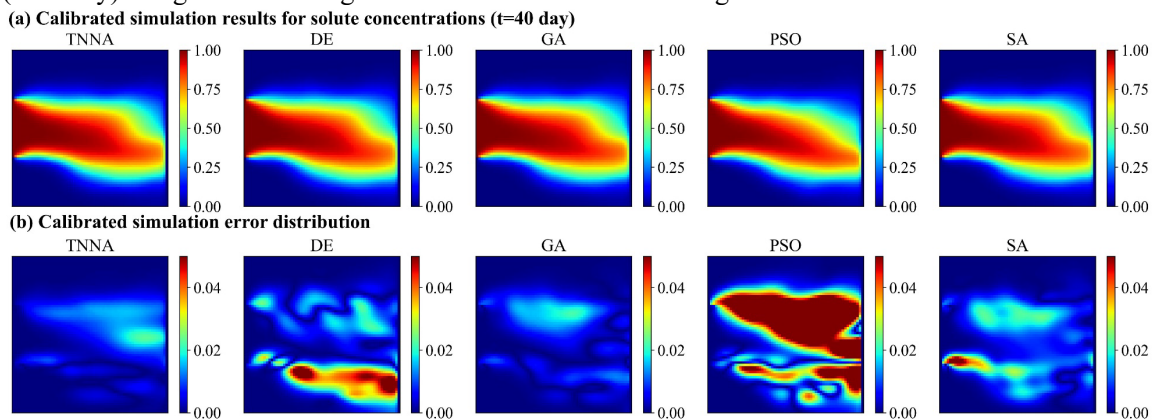

**Fig.S34.** Spatial distributions of calibrated numerical simulation results and absolute errors for solute concentrations ( $t=40$  day) using the TNNA algorithm and four metaheuristic algorithms.

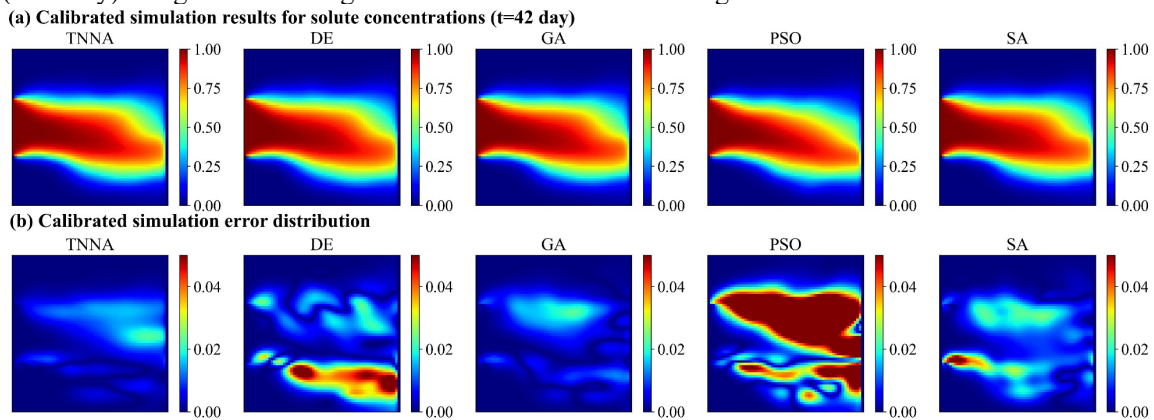

**Fig.S35.** Spatial distributions of calibrated numerical simulation results and absolute errors for solute concentrations ( $t=42$  day) using the TNNA algorithm and four metaheuristic algorithms.



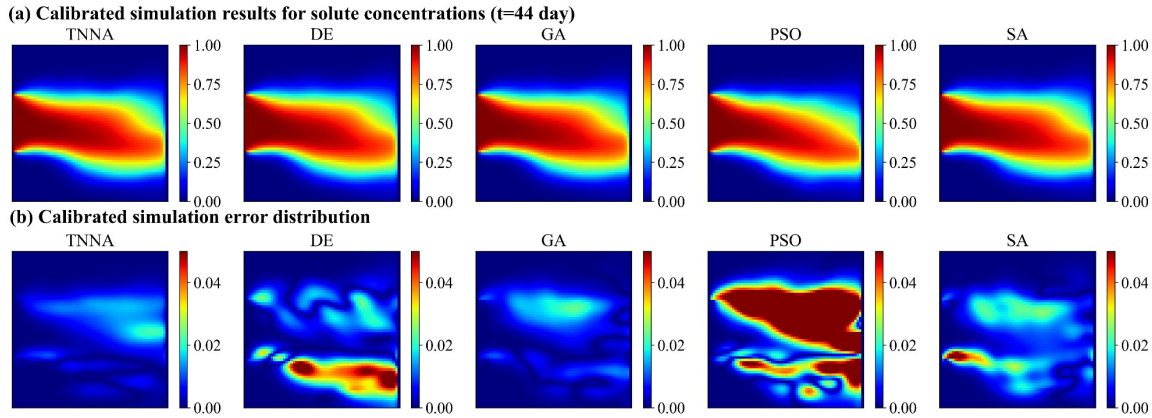

**Fig.S36.** Spatial distributions of calibrated numerical simulation results and absolute errors for solute concentrations ( $t=44$  day) using the TNNA algorithm and four metaheuristic algorithms.

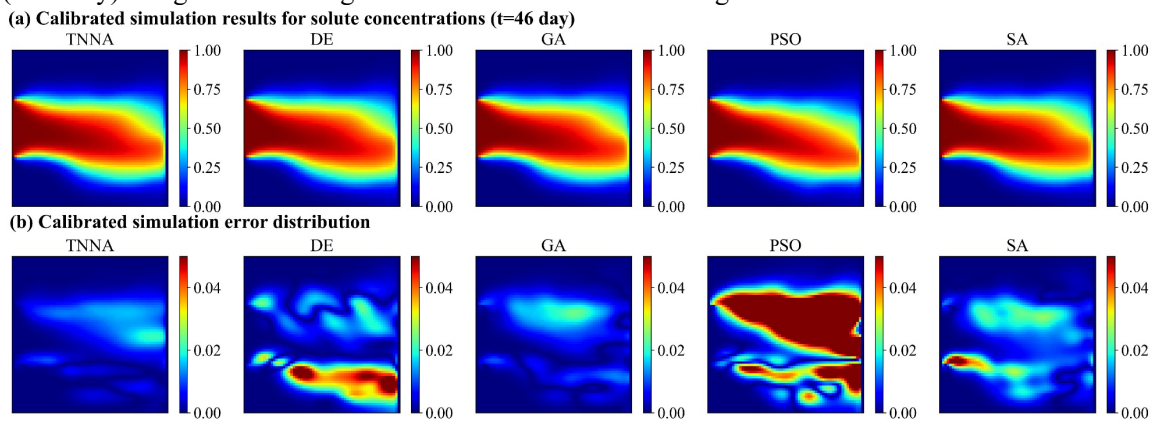

**Fig.S37.** Spatial distributions of calibrated numerical simulation results and absolute errors for solute concentrations ( $t=46$  day) using the TNNA algorithm and four metaheuristic algorithms.

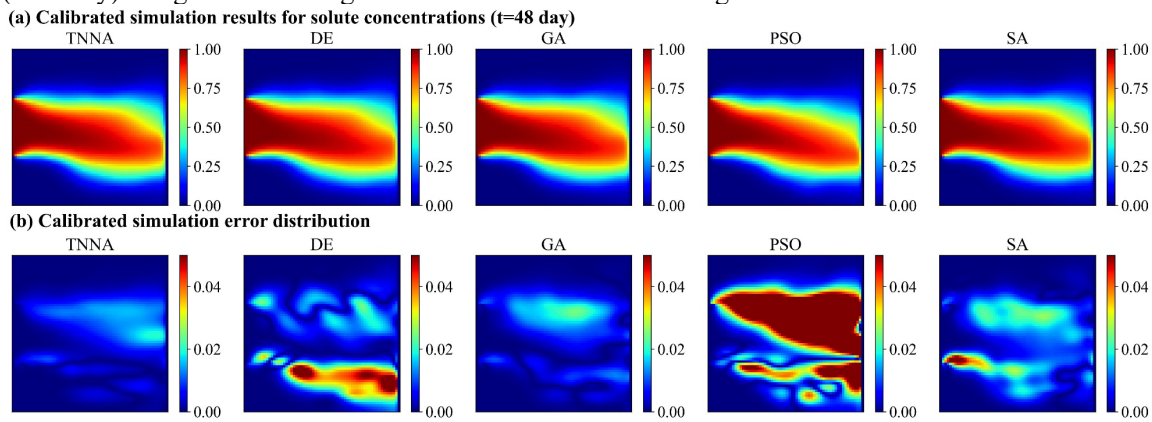

**Fig.S38.** Spatial distributions of calibrated numerical simulation results and absolute errors for solute concentrations ( $t=48$  day) using the TNNA algorithm and four metaheuristic algorithms.



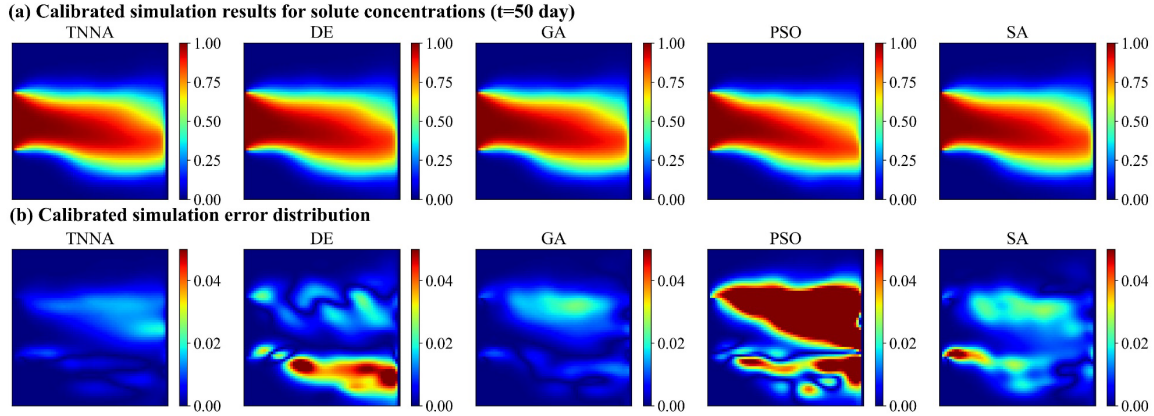

**Fig.S39.** Spatial distributions of calibrated numerical simulation results and absolute errors for solute concentrations ( $t=50$  day) using the TNNA algorithm and four metaheuristic algorithms.

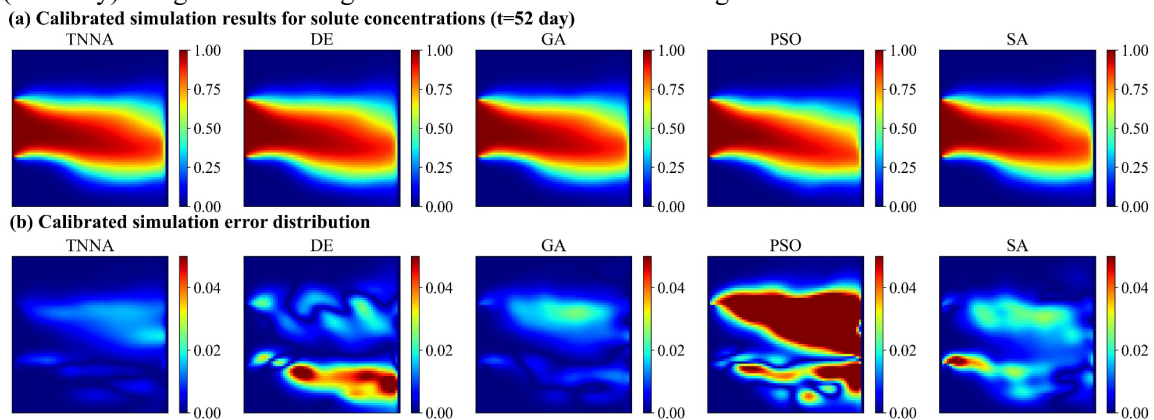

**Fig.S40.** Spatial distributions of calibrated numerical simulation results and absolute errors for solute concentrations ( $t=52$  day) using the TNNA algorithm and four metaheuristic algorithms.

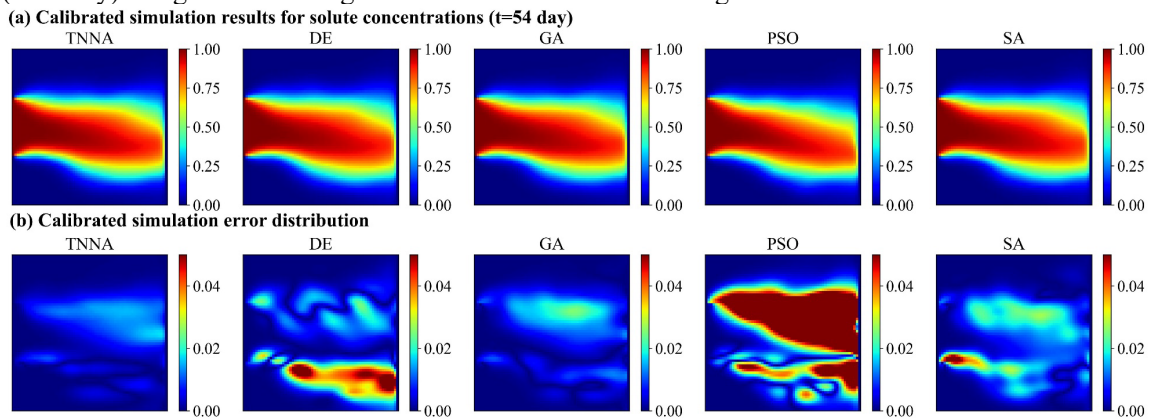

**Fig.S41.** Spatial distributions of calibrated numerical simulation results and absolute errors for solute concentrations ( $t=54$  day) using the TNNA algorithm and four metaheuristic algorithms.

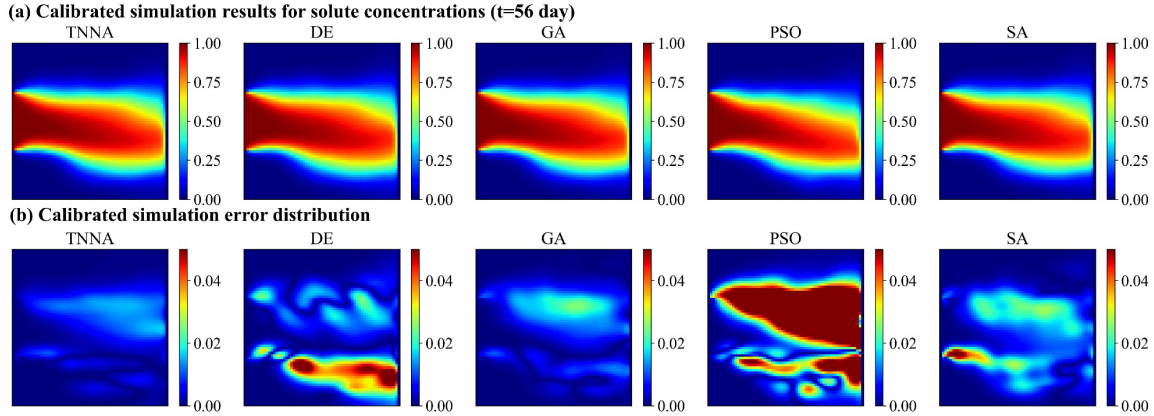

**Fig.S42.** Spatial distributions of calibrated numerical simulation results and absolute errors for solute concentrations ( $t=56$  day) using the TNNA algorithm and four metaheuristic algorithms.

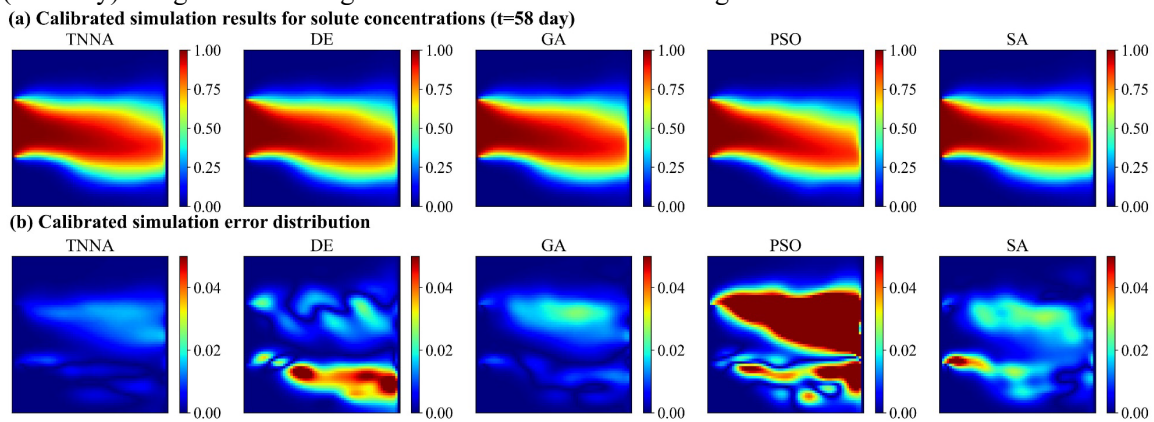

**Fig.S43.** Spatial distributions of calibrated numerical simulation results and absolute errors for solute concentrations ( $t=58$  day) using the TNNA algorithm and four metaheuristic algorithms.

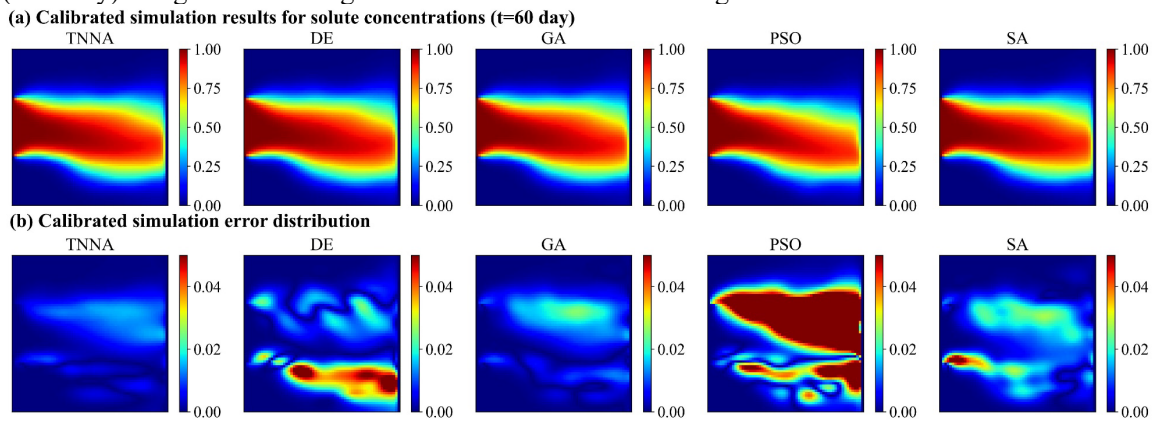

**Fig.S44.** Spatial distributions of calibrated numerical simulation results and absolute errors for solute concentrations ( $t=60$  day) using the TNNA algorithm and four metaheuristic algorithms.
